# Supplementary material for: Electronic structural modulation of bismuth catalysts induced by sulfur and oxygen co-doping for promoting CO2 electroreduction
Source: Royal Society of Chemistry journal article supplement (doi:10.1039/d2dt00624c), 2022-01-01
Supplement: d2dt00624c1.pdf [file d2dt00624c1.pdf]

## Supplementary Information

Electronic structure modulation of bismuth catalysts induced by sulfur  
and oxygen co-doping for promoting CO<sub>2</sub> electroreduction

Xiaolin Shao<sup>a</sup>, Xueliang Sun<sup>a</sup>, Qian Huang<sup>a</sup>, Jin Yi<sup>a</sup>, Jiujun Zhang<sup>a</sup> and Yuyu Liu<sup>a,\*</sup>

<sup>a</sup> Department of Chemistry/Institute for Sustainable Energy, College of Sciences, Shanghai University, Shangda Road 99, Baoshan, Shanghai 200444, China.

\*Corresponding authors: E-mail addresses: liuyuyu@shu.edu.cn (Yuyu Liu).

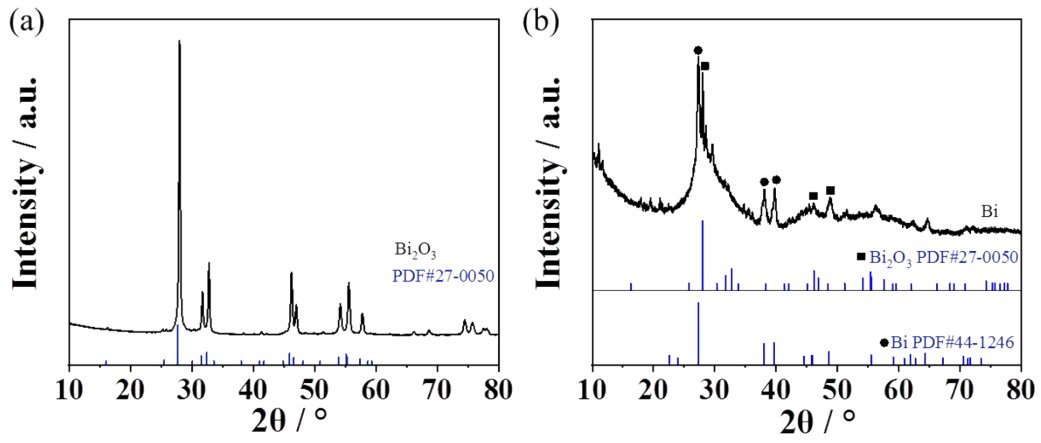

Fig. S1 XRD patterns of (a)  $\text{Bi}_2\text{O}_3$  and (b) Bi.

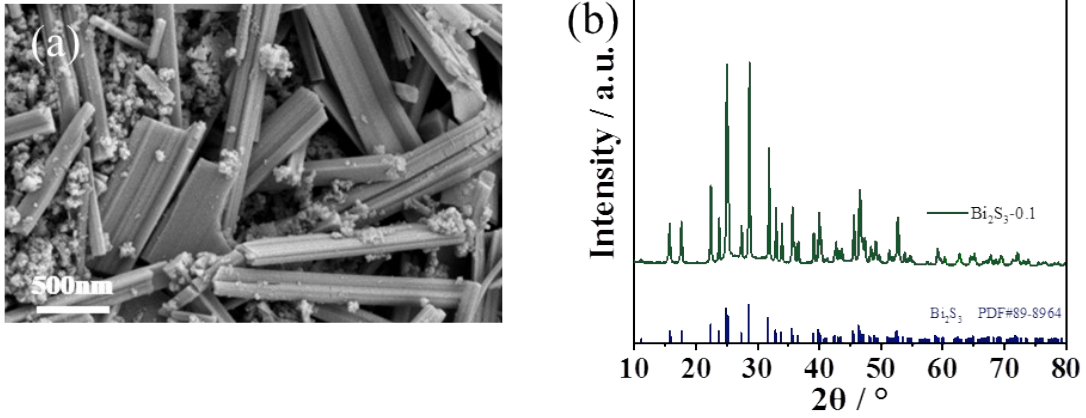

Fig. S2 (a) SEM image and (b) XRD pattern of  $\text{Bi}_2\text{S}_3$ -0.1.

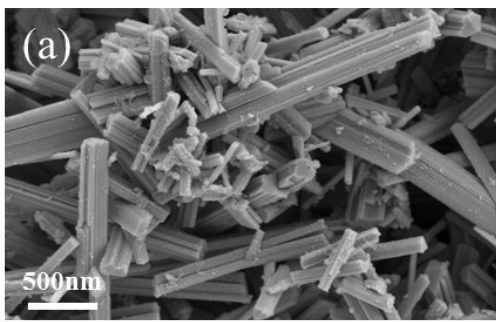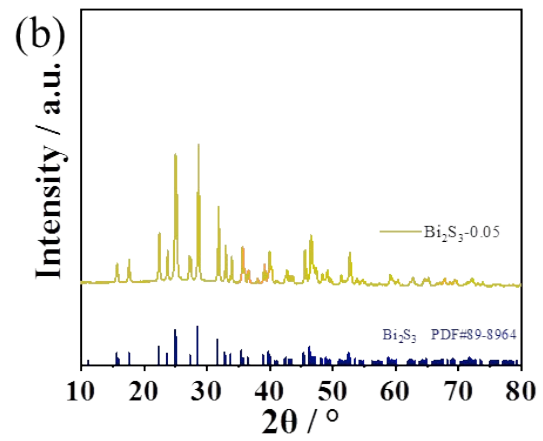

Fig. S3 (a) SEM image and (b) XRD pattern of Bi<sub>2</sub>S<sub>3</sub>-0.05.

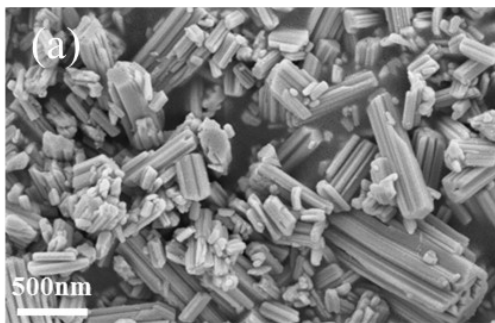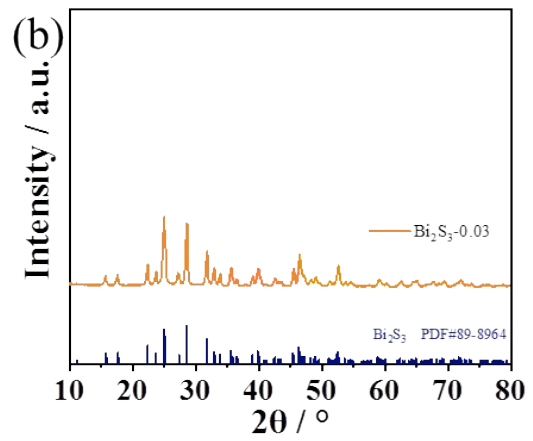

Fig. S4 (a) SEM image and (b) XRD pattern of Bi<sub>2</sub>S<sub>3</sub>-0.03.

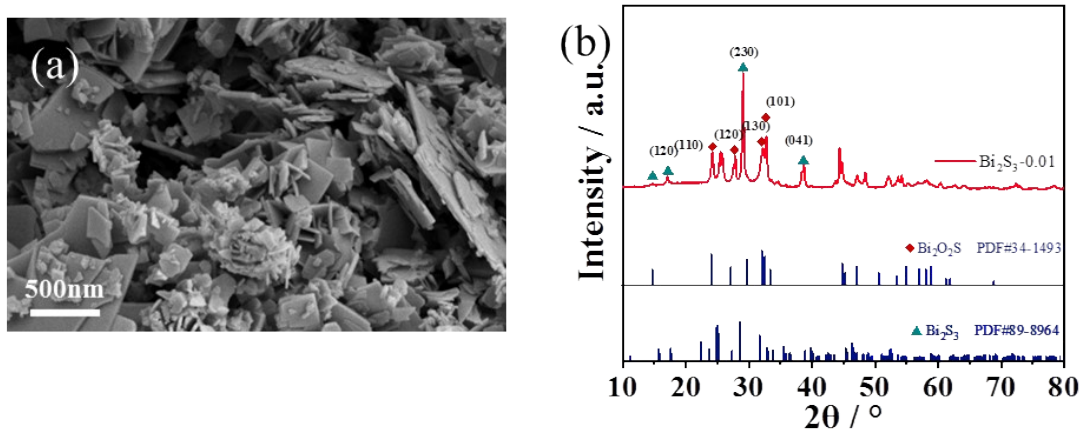

Fig. S5 (a) SEM image and (b) XRD pattern of  $\text{Bi}_2\text{S}_3$ -0.01.

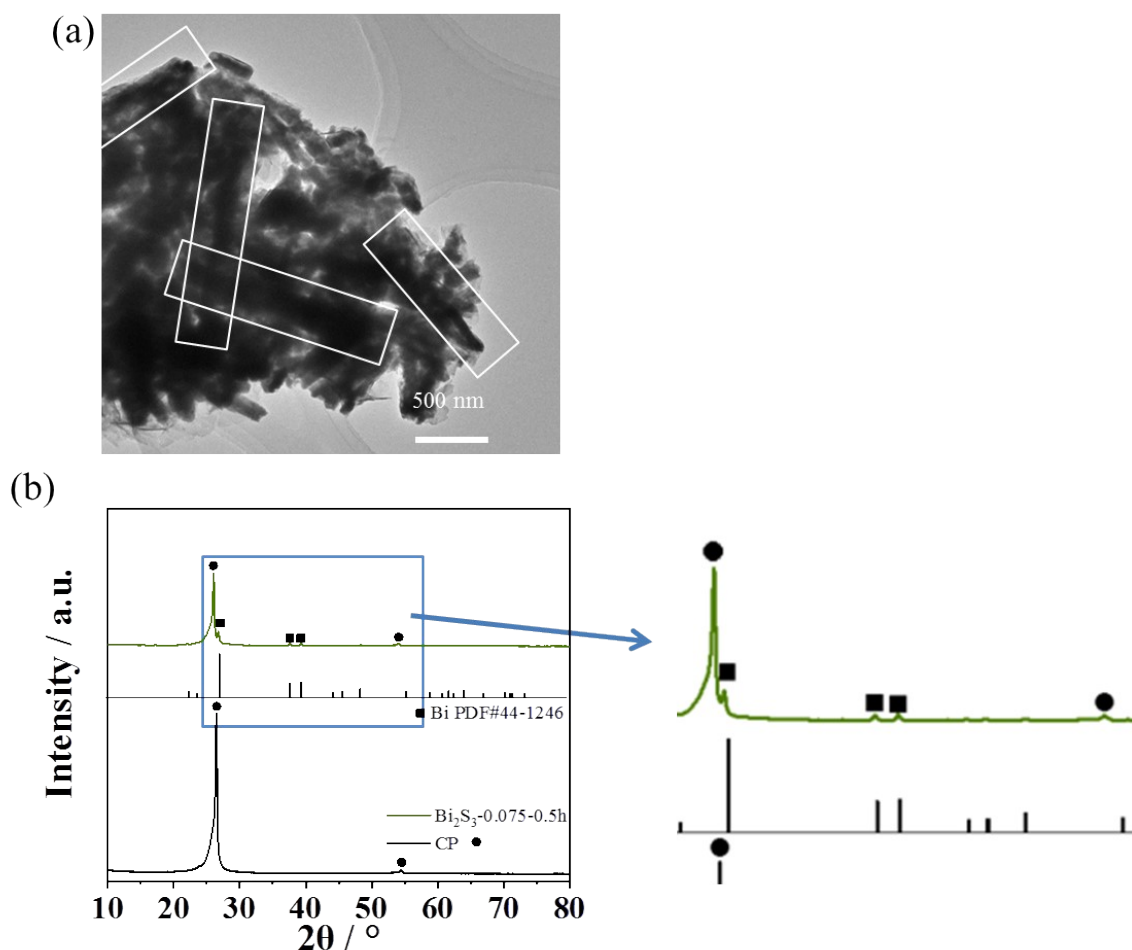

Fig. S6 (a) TEM image of  $\text{Bi}_2\text{S}_3$ -0.075-D-0.5h, (b) XRD patterns of  $\text{Bi}_2\text{S}_3$ -0.075-D-0.5h and CP.

In Fig. S6(a), because the material was scraped off the carbon paper after the reaction, some carbon paper debris was mixed.

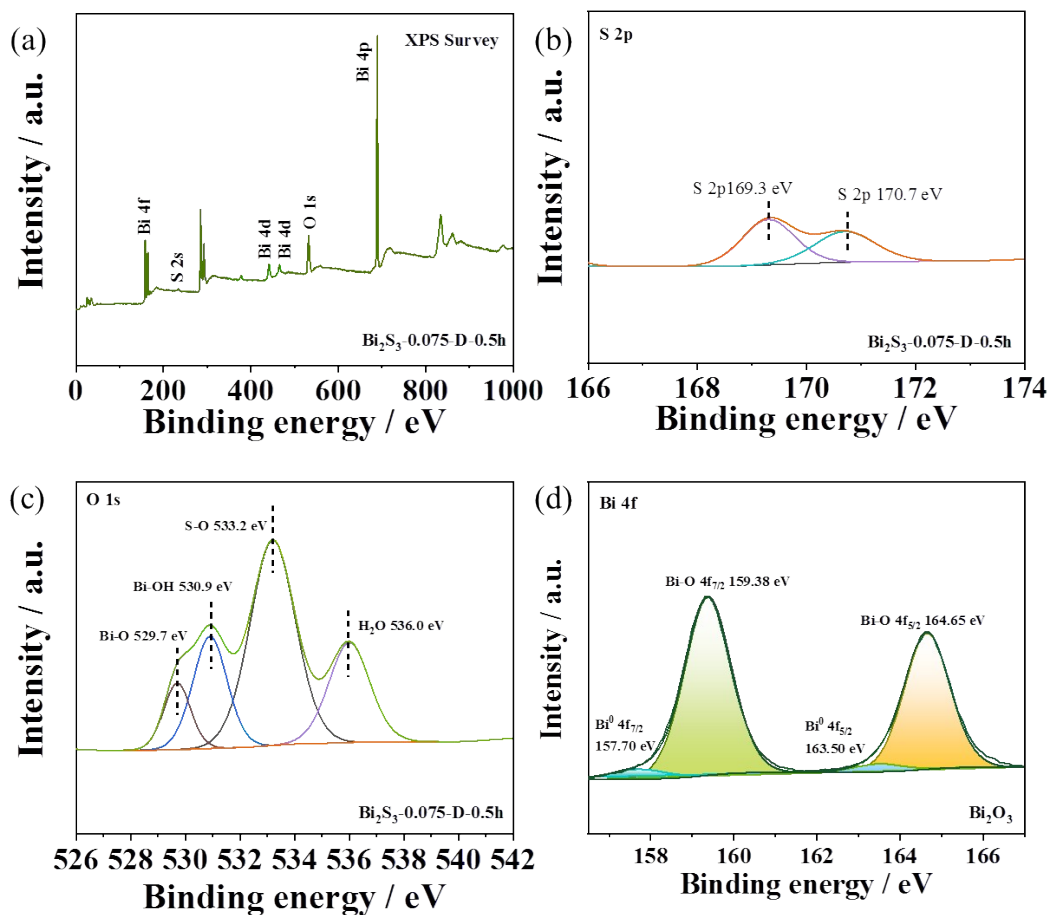

Fig. S7 XPS survey spectra of (a)  $\text{Bi}_2\text{S}_3-0.075\text{-D-0.5h}$ , (b) S 2p, (c) O 1s of  $\text{Bi}_2\text{S}_3-0.075\text{-D-0.5h}$  electrode and (d) Bi 4f of  $\text{Bi}_2\text{O}_3$  derived electrode.

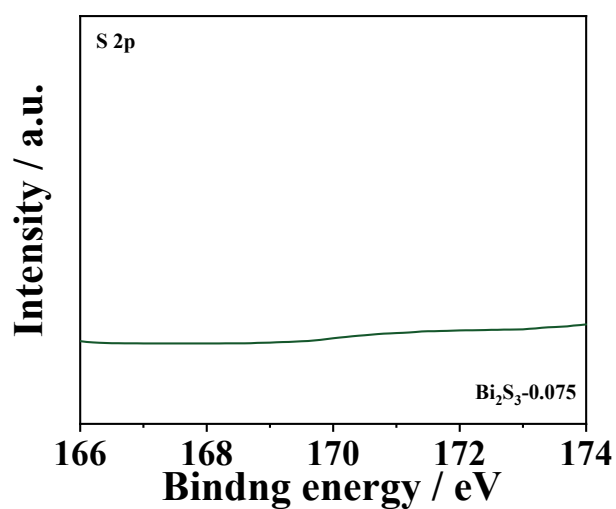

Fig. S8 XPS survey spectra of S 2p of  $\text{Bi}_2\text{S}_3-0.075$  electrode.

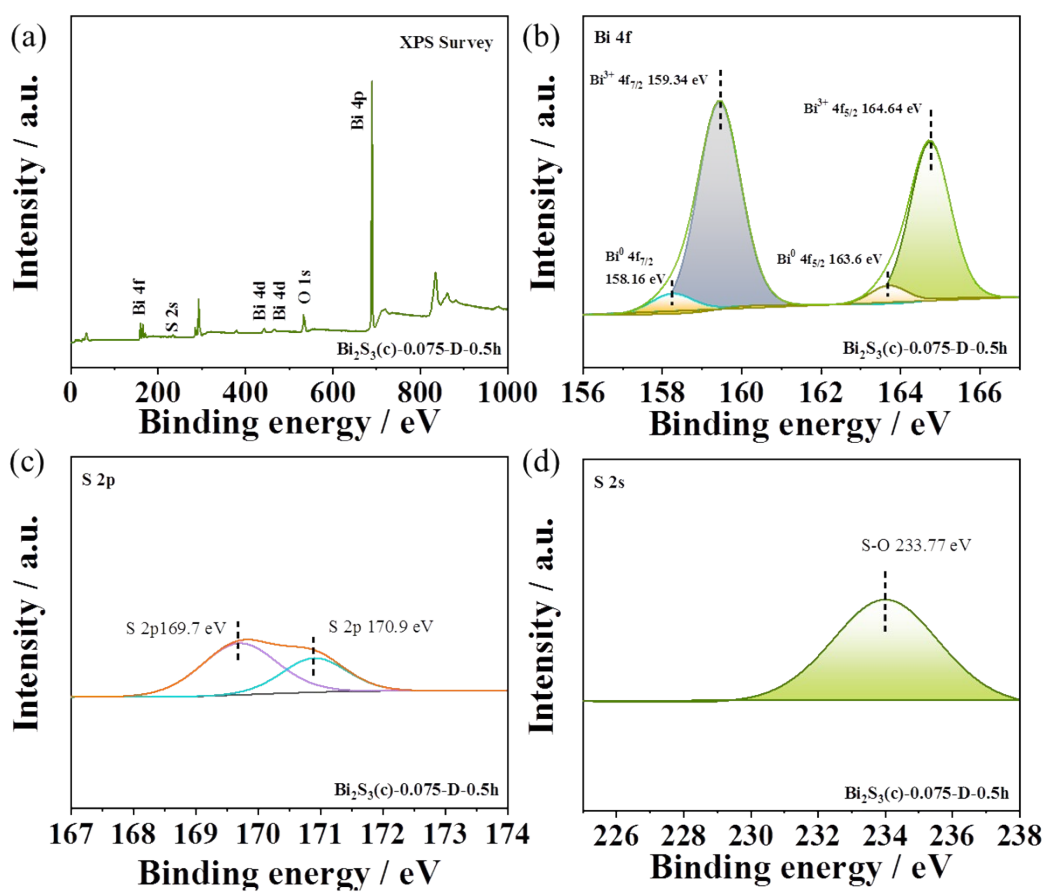

Fig. S9 XPS survey spectra of (a)  $\text{Bi}_2\text{S}_3(\text{c})-0.075\text{-D}-0.5\text{h}$  and (b) Bi 4f, (c) S 2p and (d) S 2s of  $\text{Bi}_2\text{S}_3(\text{c})-0.075\text{-D}-0.5\text{h}$  electrode.

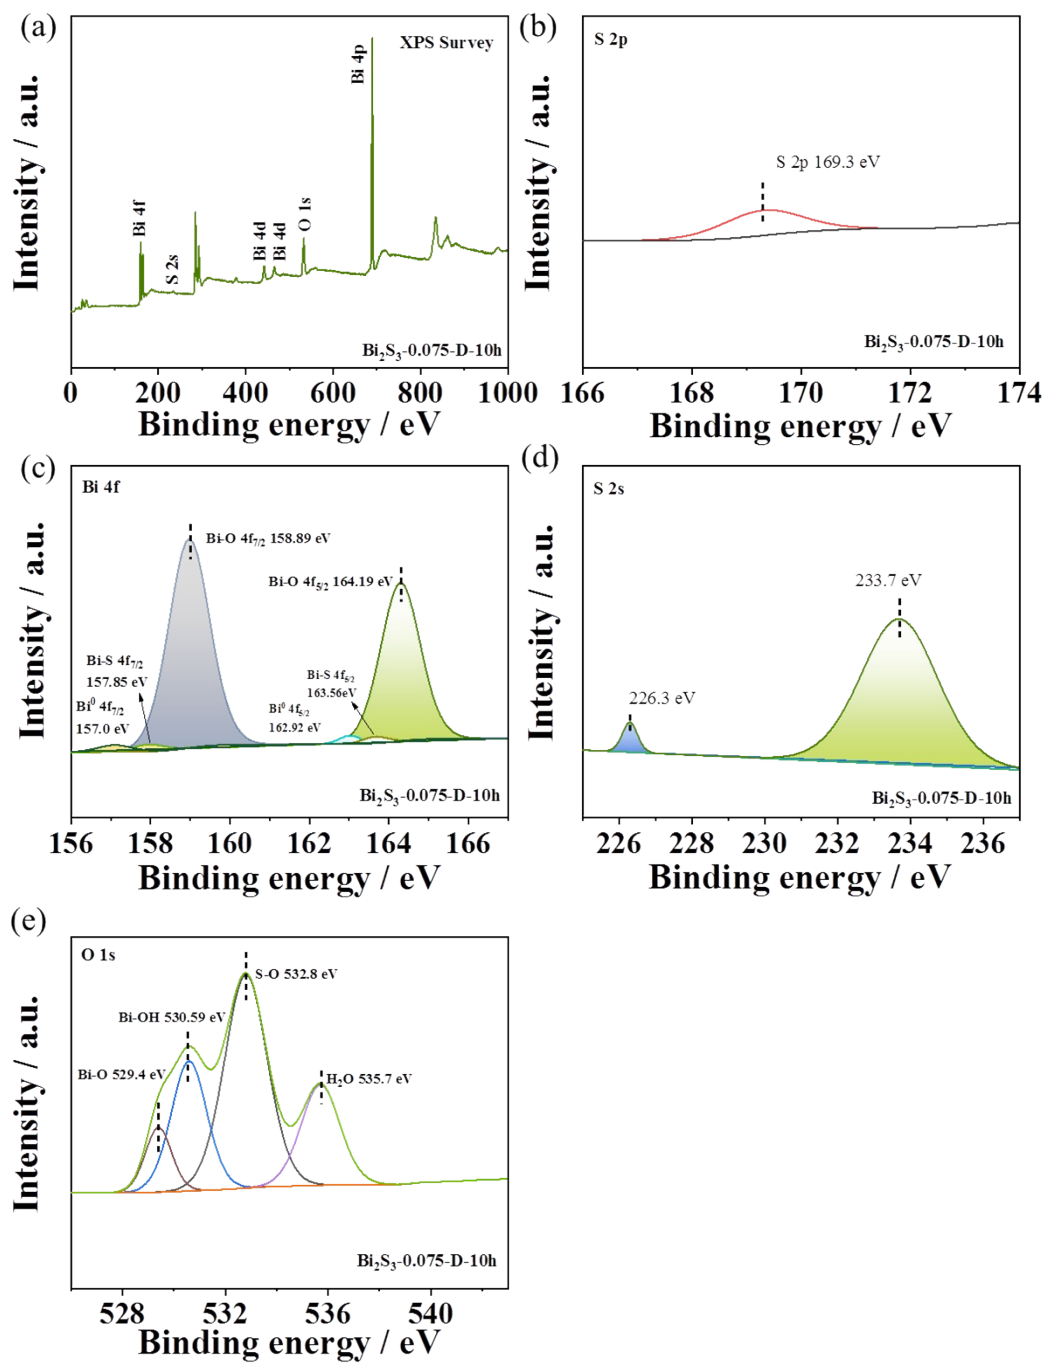

Fig. S10 XPS survey spectra of (a)  $\text{Bi}_2\text{S}_3\text{-0.075-D-10h}$  and (b) Bi 4f, (c) S 2p, (d) S 2s and (e) O 1s of  $\text{Bi}_2\text{S}_3\text{-0.075-D-10h}$  electrode.

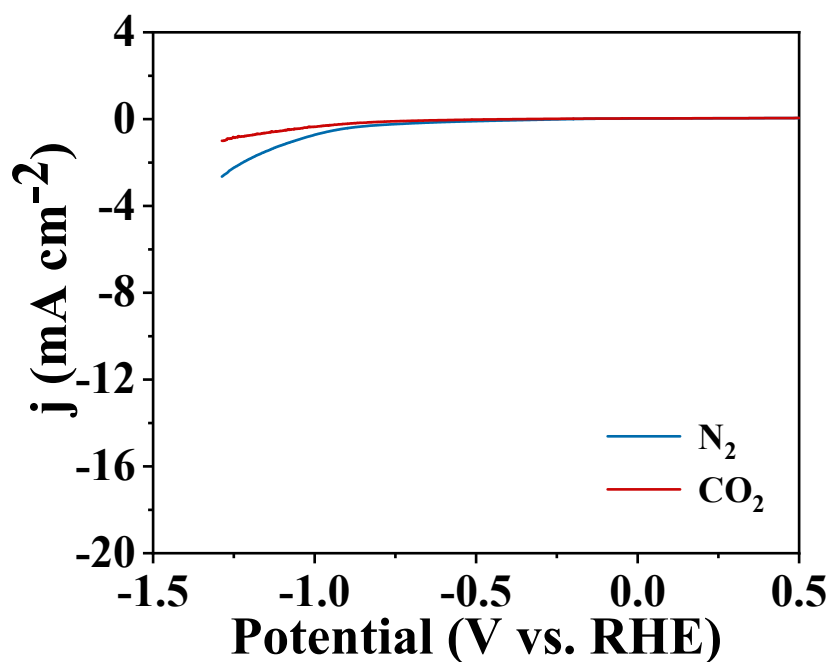

Fig. S11 LSV curves of CP in  $N_2$  and  $CO_2$  atmosphere in 0.1 M  $KHCO_3$  at  $50 \text{ mV s}^{-2}$ .

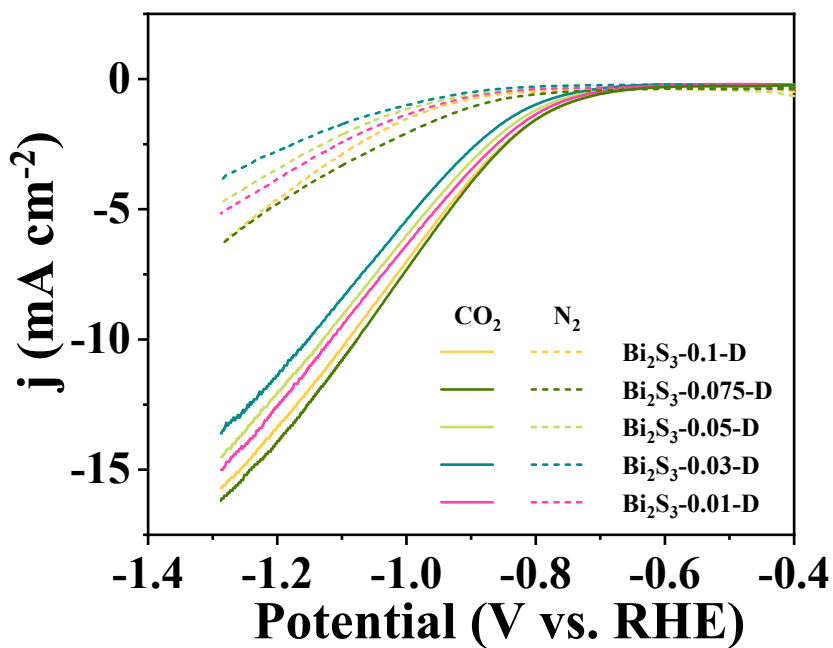

Fig. S12 LSV curves of  $Bi_2S_3$ -0.1-D,  $Bi_2S_3$ -0.075-D,  $Bi_2S_3$ -0.05-D,  $Bi_2S_3$ -0.03-D to  $Bi_2S_3$ -0.01-D in  $N_2$ -saturated and  $CO_2$ -saturated 0.1 M  $KHCO_3$  at  $50 \text{ mV s}^{-2}$ .



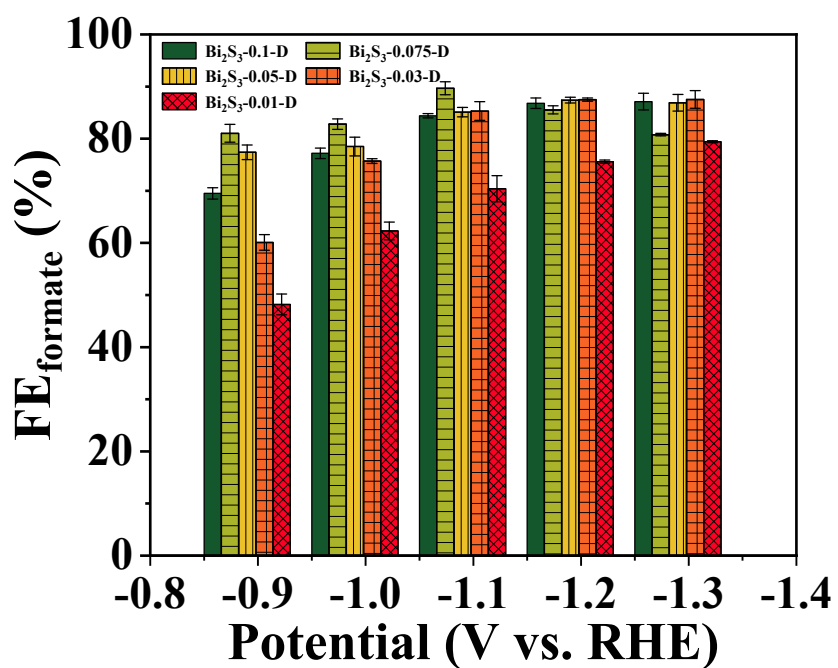

Fig. S13 The  $FE_{\text{formate}}$  of  $\text{Bi}_2\text{S}_3\text{-0.1-D}$ ,  $\text{Bi}_2\text{S}_3\text{-0.075-D}$ ,  $\text{Bi}_2\text{S}_3\text{-0.05-D}$ ,  $\text{Bi}_2\text{S}_3\text{-0.03-D}$  and  $\text{Bi}_2\text{S}_3\text{-0.01-D}$  electrodes at different applied potential.

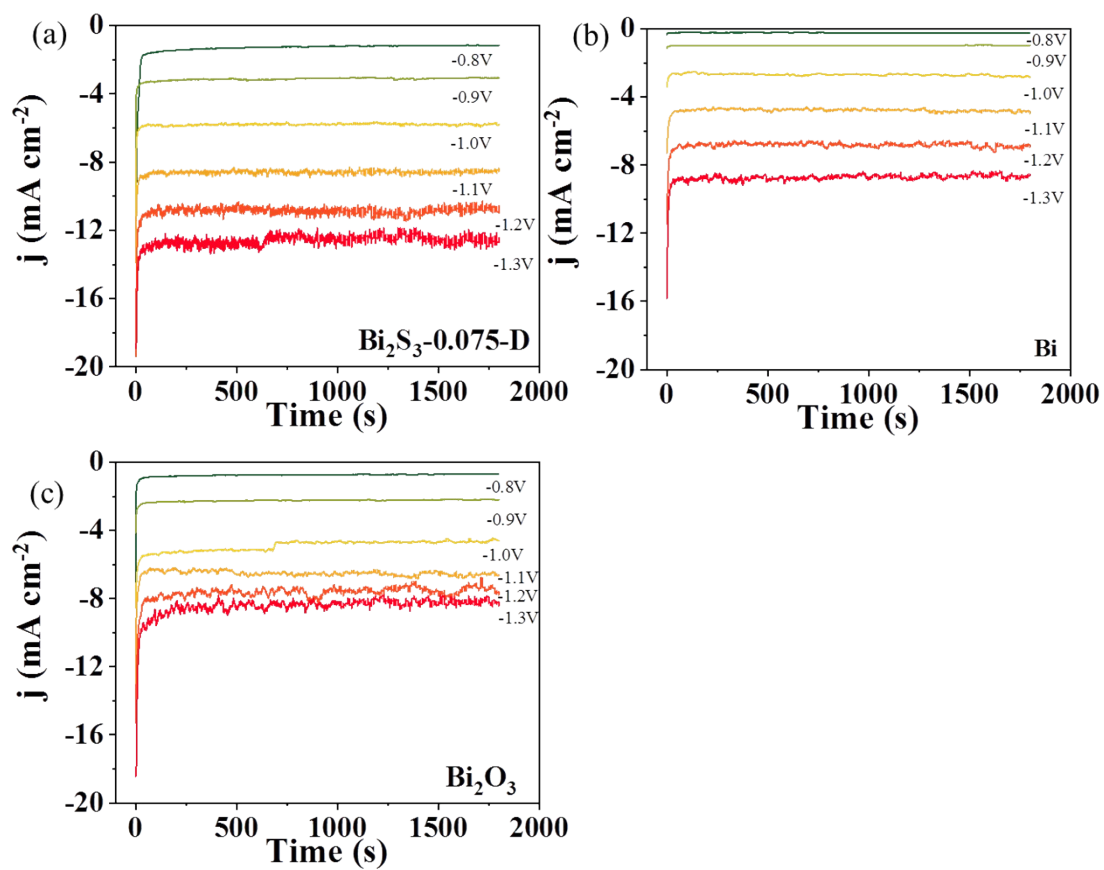

Fig. S14 I-t curves of ERCO<sub>2</sub> over (a) Bi<sub>2</sub>S<sub>3</sub>-0.075-D, (b) Bi and (d) Bi<sub>2</sub>O<sub>3</sub> at different potential within 1800 s.

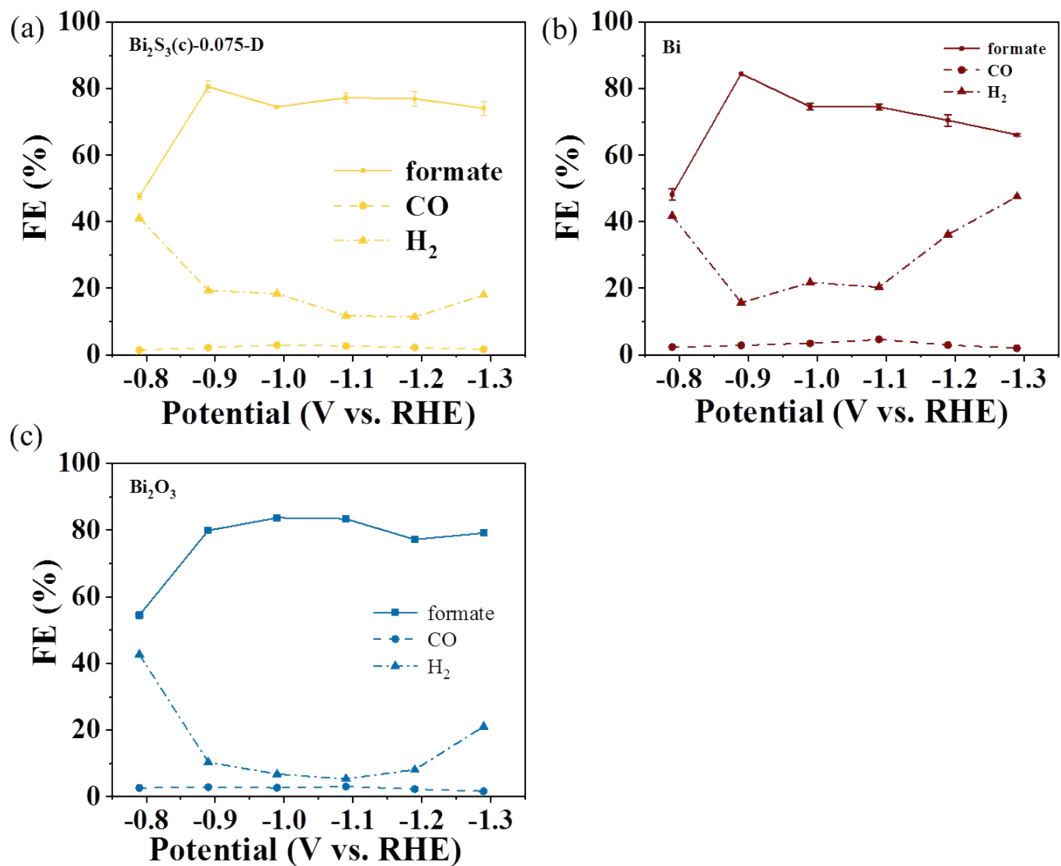

Fig. S15 FE of formate, CO and H<sub>2</sub> over (a) Bi<sub>2</sub>S<sub>3</sub>(c)-0.075-D, (b) Bi and (c) Bi<sub>2</sub>O<sub>3</sub> electrodes.

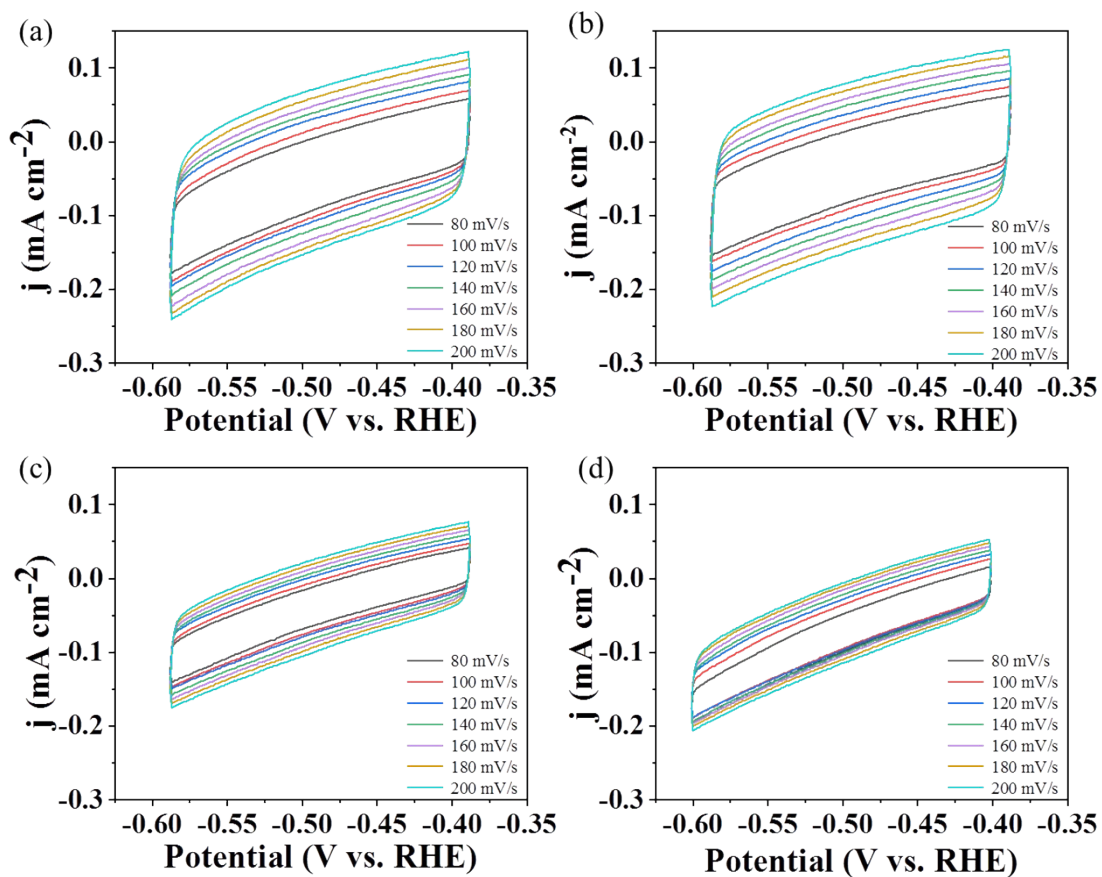

Fig. S16 CV curves of (a)  $\text{Bi}_2\text{S}_3\text{-0.1-D}$ , (b)  $\text{Bi}_2\text{S}_3\text{-0.075-D}$ , (c)  $\text{Bi}_2\text{S}_3\text{-0.05-D}$  and (d)  $\text{Bi}_2\text{S}_3\text{-0.03-D}$  at the range of  $-0.4$  to  $-0.6$  V with different scan rates in  $\text{N}_2$ -saturated  $0.1$  M  $\text{KHCO}_3$  solution.

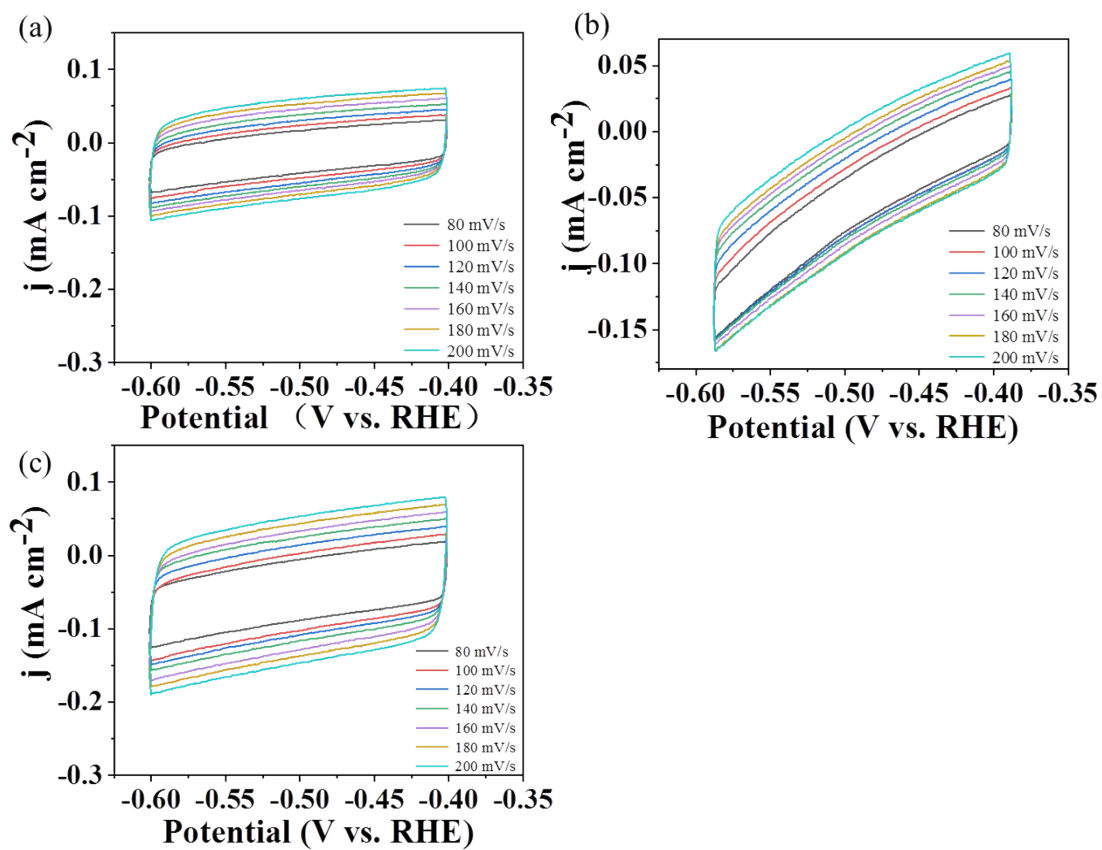

Fig. S17 CV curves of (a) Bi, (b)  $\text{Bi}_2\text{S}_3(\text{c})\text{-}0.075\text{-D}$  and (c)  $\text{Bi}_2\text{O}_3$  at the range of  $-0.4$  to  $-0.6$  V with different scan rates in  $\text{N}_2$ -saturated  $0.1$  M  $\text{KHCO}_3$  solution.

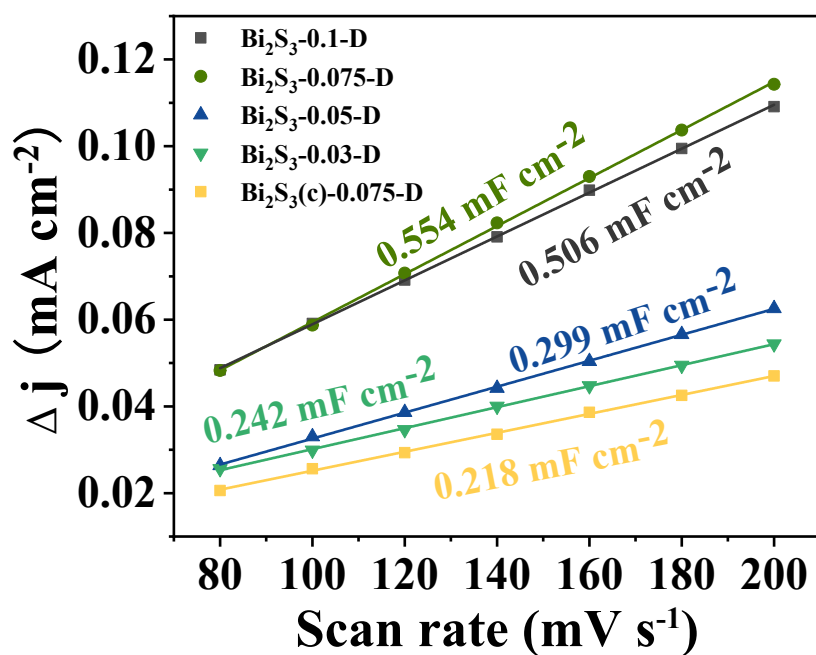

Fig. S18 Comparison of corresponding Cdl of  $\text{Bi}_2\text{S}_3$ -0.1-D,  $\text{Bi}_2\text{S}_3$ -0.075-D,  $\text{Bi}_2\text{S}_3$ -0.05-D and  $\text{Bi}_2\text{S}_3$ -0.03-D samples.

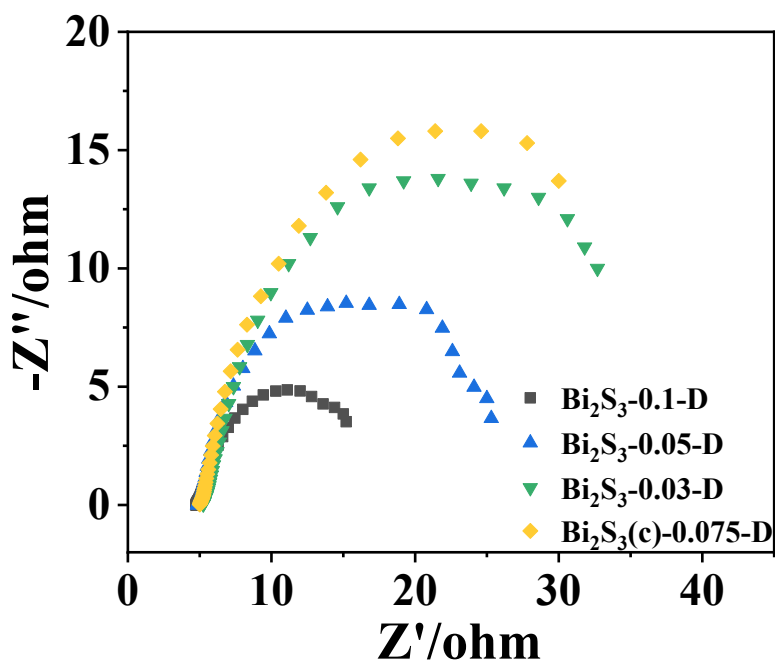

Fig. S19 EIS measurements of  $\text{Bi}_2\text{S}_3$ -0.1-D,  $\text{Bi}_2\text{S}_3$ -0.075-D,  $\text{Bi}_2\text{S}_3$ -0.05-D and  $\text{Bi}_2\text{S}_3$ -0.03-D samples at the potential of  $-1.09V_{\text{RHE}}$ .

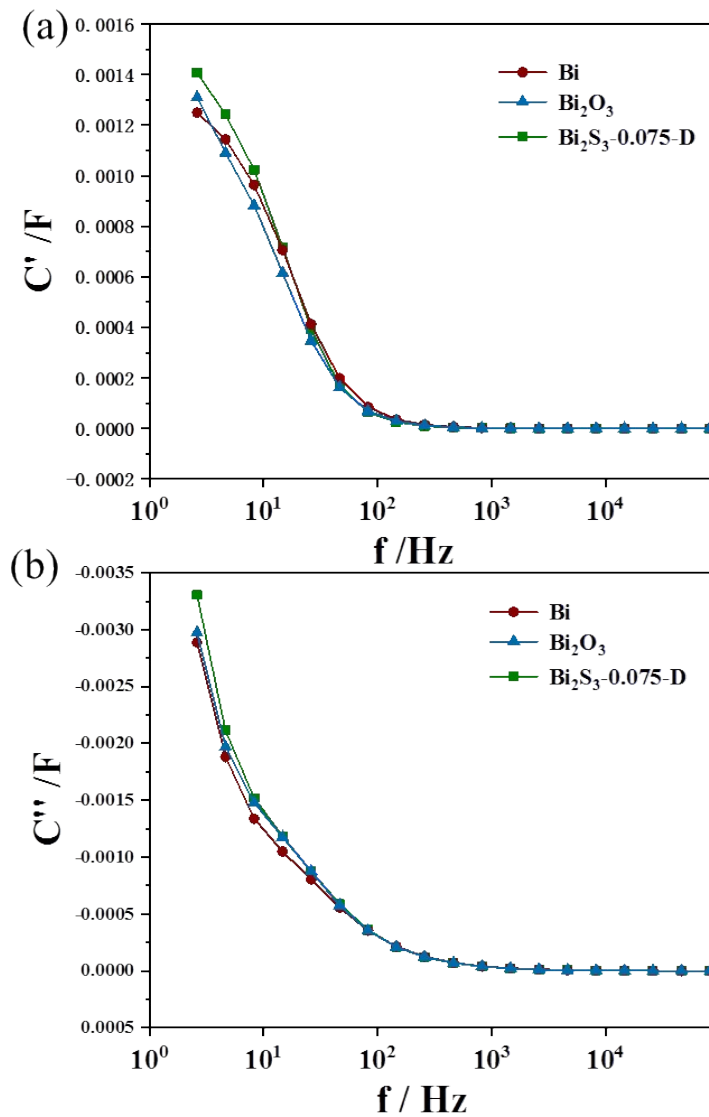

Fig. S20 Bode plots of (a) real part and (h) imaginary part of complex capacitance with respect to frequency of  $Bi_2S_3-0.075-D$ ,  $Bi_2O_3$  and Bi samples.

| Sample                                          | Bi : S: O (atomic rate) |
|-------------------------------------------------|-------------------------|
| Bi <sub>2</sub> S <sub>3</sub>                  | 1:1.47                  |
| Bi <sub>2</sub> S <sub>3</sub> -0.075-D-0.5h    | 1:10.24:11.28           |
| Bi <sub>2</sub> S <sub>3</sub> (c)-0.075-D-0.5h | 1:20.87:6.76            |
| Bi <sub>2</sub> S <sub>3</sub> -0.075-D-10h     | 1:10.09:10.35           |

Table S1 Atomic ratio of Bi to S in different materials.

| Catalysts    | Bi <sub>2</sub> S <sub>3</sub> | Bi <sub>2</sub> S <sub>3</sub> -0.075-D-0.5h | Bi <sub>2</sub> S <sub>3</sub> (c)-0.075-D-0.5h | Bi <sub>2</sub> S <sub>3</sub> -0.075-D-10h | Bi <sub>2</sub> O <sub>3</sub> -D |
|--------------|--------------------------------|----------------------------------------------|-------------------------------------------------|---------------------------------------------|-----------------------------------|
| A            | 574912.                        | 2536.52                                      | -                                               | 1466.67                                     | -                                 |
| Bi3+         | 88                             |                                              |                                                 |                                             |                                   |
| 4f7/2(Bi2S3) |                                |                                              |                                                 |                                             |                                   |
| A            | 424810.                        | 1903.91                                      | -                                               | 1052.90                                     | -                                 |
| Bi3+         | 24                             |                                              |                                                 |                                             |                                   |
| 4f5/2(Bi2S3) |                                |                                              |                                                 |                                             |                                   |
| A            | -                              | 19328.47                                     | 30788.72                                        | 54715.12                                    | 65338.93                          |
| Bi3+         |                                |                                              |                                                 |                                             |                                   |
| 4f7/2(Bi2O3) |                                |                                              |                                                 |                                             |                                   |
| A            | -                              | 14291.91                                     | 22414.77                                        | 40026.79                                    | 48735.22                          |
| Bi3+         |                                |                                              |                                                 |                                             |                                   |
| 4f5/2(Bi2O3) |                                |                                              |                                                 |                                             |                                   |
| A            | -                              | 2119.97                                      | 3091.30                                         | 1582.9                                      | 4331.67                           |
| Bi0 4f7/2    |                                |                                              |                                                 |                                             |                                   |
| A            | -                              | 1571.28                                      | 2373.81                                         | 1194.17                                     | 3124.51                           |
| Bi0 4f5/2    |                                |                                              |                                                 |                                             |                                   |

Table S2 Peak area parameters of XPS spectrum for Bi 4f of different catalysts.

| Catalysts                             | ECSA(cm <sup>2</sup> ) |
|---------------------------------------|------------------------|
| Bi <sub>2</sub> S <sub>3</sub> -0.075 | 6.925                  |
| Bi                                    | 4.06                   |
| Bi <sub>2</sub> O <sub>3</sub>        | 6.05                   |

Table S3 The electrochemical active surface area of different catalysts.



| Catalyst                                                                       | Electrolyte                            | Potential<br>(V vs. RHE) | J<br>(mA cm <sup>-2</sup> ) | FE <sub>formate</sub><br>(%) | Ref.         |
|--------------------------------------------------------------------------------|----------------------------------------|--------------------------|-----------------------------|------------------------------|--------------|
| Defect-rich Bi<br>(derived from<br>Bi <sub>2</sub> S <sub>3</sub> )            | 0.5 M<br>NaHCO <sub>3</sub>            | -0.75                    | 5                           | 84                           | 1            |
| Bi with rich<br>Bi-O bond<br>(derived from<br>Bi <sub>2</sub> S <sub>3</sub> ) | 0.5 M KHCO <sub>3</sub>                | -1.0                     | 6.6                         | 80                           | 2            |
| Bi <sub>2</sub> S <sub>3</sub> -<br>Bi <sub>2</sub> O <sub>3</sub> @rGO        | 0.1 M KHCO <sub>3</sub>                | -0.9                     | 4                           | 90.1                         | 3            |
| S doped BiOC                                                                   | 0.5 M KHCO <sub>3</sub>                | -0.9                     | 30                          | 96.7                         | 4            |
| Bi<br>nanoparticles                                                            | 0.5 M KHCO <sub>3</sub>                | -0.83                    | 55                          | 86                           | 5            |
| β-Bi <sub>2</sub> O <sub>3</sub>                                               | 0.1 M KHCO <sub>3</sub>                | -1.2                     | 20.9                        | 87                           | 6            |
| Bi nanosheets                                                                  | 0.1 M KHCO <sub>3</sub><br>(flow cell) | -1.36                    | 210                         | 88.1                         | 7            |
| Bi/Bi <sub>2</sub> O <sub>3</sub><br>nanoparticles                             | 0.5 M KHCO <sub>3</sub>                | -0.9                     | 18                          | 85                           | 8            |
| Bi Dendrite                                                                    | 0.5 M KHCO <sub>3</sub>                | -0.74                    | 3.2                         | 89                           | 9            |
| Bi nanosheets                                                                  | 0.1 M KHCO <sub>3</sub>                | -1.1                     | 17                          | 86.0                         | 10           |
| S and O co-<br>doping Bi                                                       | 0.1 M KHCO <sub>3</sub>                | -1.09                    | 9                           | 89.7                         | This<br>work |

Table S4 The performance of CO<sub>2</sub> electroreduction to formate over Bi-based catalysts reported recently.

## References

1. Y. Zhang, F. W. Li, X. L. Zhang, T. Williams, C. D. Easton, A. M. Bond and J. Zhang, *J. Mater. Chem. A*, 2018, **6**, 4714-4720.
2. Y. T. Wang, L. Cheng, J. Z. Liu, C. Q. Xiao, B. Zhang, Q. H. Xiong, T. Zhang, Z. L. Jiang, H. Jiang, Y. H. Zhu, Y. H. Li and C. Z. Li, *Chemelectrochem*, 2020, **7**, 2864-2868.
3. X. Yang, P. Deng, D. Liu, S. Zhao, D. Li, H. Wu, Y. Ma, B. Y. Xia, M. Li, C. Xiao and S. Ding, *J. Mater. Chem. A*, 2020, **8**, 2472-2480.
4. J. Wang, J. Mao, X. Zheng, Y. Zhou and Q. Xu, *Appl. Surf. Sci.*, 2021, **562**, 150197.
5. W. Dan, W. Xuewan, F. Xian-Zhu and L. Jing-Li, *Appl. Catal. B-Environ.*, 2021, **284**, 119723.
6. T.-P. Thanh, R. Daiyan, Z. Fusco, Z. Ma, R. Amal and A. Tricoli, *Adv. Funct. Mater.*, 2020, **30**, 1906478.
7. J. Yang, X. L. Wang, Y. T. Qu, X. Wang, H. Huo, Q. K. Fan, J. Wang, L. M. Yang and Y. E. Wu, *Adv. Energy Mater.*, 2020, **10**, 2001709.
8. J. J. Sun, W. Z. Zheng, S. L. Lyu, F. He, B. Yang, Z. J. Li, L. C. Lei and Y. Hou, *Chin. Chem. Lett.*, 2020, **31**, 1415-1421.
9. J. H. Koh, D. H. Won, T. Eom, N. K. Kim, K. D. Jung, H. Kim, Y. J. Hwang and B. K. Min, *ACS Catal.*, 2017, **7**, 5071-5077.
10. W. Zhang, Y. Hu, L. Ma, G. Zhu, P. Zhao, X. Xue, R. Chen, S. Yang, J. Ma, J. Liu and Z. Jin, *Nano Energy*, 2018, **53**, 808-816.
